# Supplementary material
Source: publisher figshare collection journal article supplement (https://karger.figshare.com/articles/dataset/_/5123857)
Supplement: Supplementary file 1 [file 1 › 000341613_sm_Tables.pdf]

## Tables

**Table. 1.** PCR primer sequences used in site-directed mutagenesis of mutations in the heptad repeat regions

| Mutations | Name of primers | of primer sequences (5'-3')*         | Name of products | of Product length(bp) |
|-----------|-----------------|--------------------------------------|------------------|-----------------------|
| L74A      | L74A-P1 up      | TTACA TCTGC <u>AGCGG</u> GTTCC AATCA | L74A-P1          | 3394                  |
|           | L74A-P1 down    | GACTT GGTG AGTACTCACC AGTCA C        |                  |                       |
|           | L74A-P2 up      | GTGACT GGTGA GTACT CAACC AAGTC       | L74A-P2          | 1405                  |
|           | L74A-P2 down    | TGATT GGAAC <u>CQCGT</u> GCAGA TGTA  |                  |                       |
| V81A      | V81A-P1 up      | TCAGG ATGTA <u>GCGGA</u> TAGGA TATAC | V81A-P1          | 3372                  |
|           | V81-P1 down     | GACTT GGTG AGTACTCACC AGTCA C        |                  |                       |
|           | V81A-P2 up      | GTGACT GGTGA GTACT CAACC AAGTC       | V81A-P2          | 1427                  |
|           | V81A-P2 down    | GTATA TCCTA <u>TCCGC</u> TACAT CCTGA |                  |                       |
| V88A      | V88A-P1 up      | TATAC AAGCA <u>GGCGG</u> CTCTT GAATC | V88A-P1          | 3352                  |
|           | V88A-P1 down    | GACTT GGTG AGTACTCACC AGTCA C        |                  |                       |
|           | V88A-P2 up      | GTGACT GGTGA GTACT CAACC AAGTC       | V88A-P2          | 1447                  |
|           | V88A-P2 down    | GATTC AAGAG <u>CQCGC</u> TGCTT GTATA |                  |                       |
| L96A      | L96A-P1 up      | TCCGT TGGCA <u>GCGCT</u> AAACA CCGAA | L96 A-P1         | 3327                  |
|           | L96A-P1 down    | GACTT GGTG AGTACTCACC AGTCA C        |                  |                       |
|           | L96A-P2 up      | GTGACT GGTGA GTACT CAACC AAGTC       | L96 A-P2         | 1472                  |
|           | L96A-P2 down    | TTCGG TGTTT <u>AGCGC</u> TGCCA ACGGA |                  |                       |
| I103A     | I103A-P1 up     | ACCGA ATCTA <u>TAGCG</u> ATGAA TGCAA | I103A-P1         | 3308                  |
|           | I103A-P1 down   | GACTT GGTG AGTACTCACC AGTCA C        |                  |                       |
|           | I103A-P2 up     | GTGACT GGTGA GTACT CAACC AAGTC       | I103A-P2         | 1491                  |
|           | I103A-P2 down   | TTGCA TTCAT <u>CGCTA</u> TAGAT TCGGT |                  |                       |
| L110A     | L110A-P1 up     | AATAA CATCC <u>GCGTC</u> TTATC AGATC | L110A-P1         | 3285                  |
|           | L110A-P1down    | GACTT GGTG AGTACTCACC AGTCA C        |                  |                       |
|           | L110A-P2 up     | GTGACT GGTGA GTACT CAACC AAGTC       | L110A-P2         | 1514                  |
|           | L110A-P2down    | GATCT GATAA <u>GACGC</u> GGATG TTATT |                  |                       |

<sup>a</sup> Mutated sites are underlined in the primer sequences

**Table. 2.** PCR primer sequences used in site-directed mutagenesis of mutations in the carbohydrate addition sites

| Mutations | Name of primers | primer sequences (5'-3')*            | Name of products | length(bp) |
|-----------|-----------------|--------------------------------------|------------------|------------|
| N119A     | N119A-P1 up     | TGGAG CTGCA <u>GCGAA</u> CAGCG GGTGT | N119A-P1         | 3394       |
|           | N119A-P1 down   | GACTT GGTTG AGTACTCACC AGTCA C       |                  |            |
|           | N119A-P2 up     | GTGACT GGTGA GTACT CAACC AAGTC       | N119A-P2         | 1405       |
|           | N119A-P2 down   | ACACC CGCTG <u>TCGCG</u> TGCAG CTCCA |                  |            |
| N341A     | N341A-P1 up     | TAAGC GATAC <u>GCGGA</u> CACAT GCCCA | N341A -P1        | 2592       |
|           | N341A-P1 down   | GACTT GGTTG AGTACTCACC AGTCA C       |                  |            |
|           | N341A-P2 up     | GTGACT GGTGA GTACT CAACC AAGTC       | N341A -P2        | 2207       |
|           | N341A-P2 down   | TGGGC ATGTG <u>TCCGC</u> GTATC GCTTA |                  |            |
| N433A     | N433A-P1 up     | TGACA GTCAA <u>GCGCA</u> ACACA GCCAC | N433A-P1         | 2317       |
|           | N433A-P1 down   | GACTT GGTTG AGTACTCACC AGTCA C       |                  |            |
|           | N433A-P2 up     | GTGACT GGTGA GTACT CAACC AAGTC       | N433A-P2         | 2482       |
|           | N433A-P2 down   | GTGGC TGTGT <u>TCCGC</u> TTGAC TGTCA |                  |            |
| N481A     | N481A-P1 up     | CTTCC ATAGG <u>GCGCA</u> CACCT TGCGA | N481A-P1         | 2172       |
|           | N481A-P1 down   | GACTT GGTTG AGTACTCACC AGTCA C       |                  |            |
|           | N481A-P2 up     | GTGACT GGTGA GTACT CAACC AAGTC       | N481A-P2         | 2627       |
|           | N481A-P2 down   | TCGCA AGGTG <u>TCCGC</u> CCTAT GGAAG |                  |            |

3 <sup>a</sup> Muated sites are underlined in the primer sequences
